# Supplementary material for: Enhancing High-Resolution Forest Stand Mean Height Mapping in China through an Individual Tree-Based Approach with Close-Range LiDAR Data
Source: Copernicus journal article supplement (doi:10.5194/essd-2024-274), 2024-07-30
Supplement: Supplementary file 1 [file essd-2024-274-supplement.pdf]

1 **Enhancing High-Resolution Forest Stand Mean Height**  
2 **Mapping in China through an Individual Tree-Based**  
3 **Approach with Close-Range LiDAR Data**

4 Yuling Chen<sup>1,★</sup>, Haitao Yang<sup>1,★</sup>, Zekun Yang<sup>1</sup>, Qiuli Yang<sup>2,3</sup>, Weiyan Liu<sup>4</sup>, Guoran  
5 Huang<sup>5</sup>, Yu Ren<sup>1</sup>, Kai Cheng<sup>1</sup>, Tianyu Xiang<sup>6</sup>, Mengxi Chen<sup>1</sup>, Danyang Lin<sup>4</sup>, Zhiyong  
6 Qi<sup>1</sup>, Jiachen Xu<sup>1</sup>, Yixuan Zhang<sup>1</sup>, Guangcai Xu<sup>7</sup>, Qinghua Guo<sup>1,8\*</sup>

7 <sup>1</sup>Institute of Remote Sensing and Geographic Information System, School of Earth and Space Sciences,  
8 Peking University, Beijing 100871, China

9 <sup>2</sup>College of Geography and Remote Sensing Science, Xinjiang University, Urumqi 800017, China

10 <sup>3</sup>Xinjiang Key Laboratory of Oasis Ecology, Xinjiang University, Urumqi 830017, China

11 <sup>4</sup>State Forestry and Grassland Administration Key Laboratory of Forest Resources & Environmental  
12 Management, Beijing Forestry University, Beijing 100083, China

13 <sup>5</sup>College of Forestry, Southwest Forestry University, Kunming 650224, China

14 <sup>6</sup>College of Earth Sciences, Chengdu University of Technology, Chengdu 610059, China

15 <sup>7</sup>Institute of Ecology, College of Urban and Environmental Sciences, Peking University, Beijing 100871,  
16 China

17  
18 <sup>★</sup>These authors contributed equally to this work.

19 *Correspondence to:* Qinghua Guo (guo.qinghua@pku.edu.cn)

## Supplementary data

21

22 **Table S1.** The mathematic formulas of the stand mean height growth equations.

| NO. | Model             | Equation                             |
|-----|-------------------|--------------------------------------|
| 1   | Logistic,1838     | $H = \frac{A}{1 + m \times e^{-rt}}$ |
| 2   | Mitscherlich,1850 | $H = A \times (1 - e^{-rt})$         |
| 3   | Gompertz,1825     | $H = A \times e^{-m \times e^{-rt}}$ |
| 4   | Korf,1939         | $H = A \times e^{-m \times t^{-r}}$  |
| 5   | Richards,1959     | $H = A \times (1 - e^{-rt})^m$       |
| 6   | Schumacher, 1939  | $H = A \times e^{-r/t}$              |

23 Notes:  $H$  is the forest stand height (m),  $t$  is the forest age (years), and  $A$ ,  $m$ , and  $r$  ( $r > 0$ ) are the model  
 24 parameters.  $A$  is maximum growth parameter,  $m$  is the parameter related to the initial value,  $r$  is the growth  
 25 rate parameter.

26 **Table S2.** The fitting results of stand weighted mean height growth model

| NO. | Parameter estimation |       |        | RMSE | R2   |
|-----|----------------------|-------|--------|------|------|
|     | A                    | m     | r      |      |      |
| 1   | 15.937               | 6.057 | 0.101  | 4.4  | 0.48 |
| 2   | 16.762               | ---   | 0.043  | 4.5  | 0.46 |
| 3   | 16.182               | 2.320 | 0.071  | 4.5  | 0.47 |
| 4   | 1258.080             | 6.656 | 0.096  | 4.9  | 0.37 |
| 5   | 16.346               | 1.294 | 0.054  | 4.5  | 0.46 |
| 6   | 18.748               | ---   | 12.734 | 4.6  | 0.43 |

27 **Table S3.** Test results for stand weighted mean height growth model

| NO.      | ME         | MAE        | RMSE       |
|----------|------------|------------|------------|
| <b>1</b> | <b>0.1</b> | <b>3.5</b> | <b>4.4</b> |
| 2        | 0.0        | 3.6        | 4.5        |
| 3        | 0.1        | 3.6        | 4.4        |
| 4        | 0.8        | 3.8        | 4.9        |
| 5        | 0.1        | 3.6        | 4.5        |
| 6        | 0.2        | 3.7        | 4.6        |

28 **Table S4.** Comparison of deviations between weighted mean heights with different weights ( $w_1$  and  $w_2$ )

29 and Lorey's mean height (national forest inventory data)

| Weight | ME      | MAE    | RMSE   |
|--------|---------|--------|--------|
| $w_1$  | -0.0197 | 1.8069 | 2.4178 |
| $w_2$  | -0.0072 | 1.8056 | 2.4174 |

30

31 **Table S5.** Model selection results based on *PyCaret*

| Model                | ID                           | Algorithm                       | MAE      | MSE     | RMSE    | R2     | RMSLE  | MAPE   | TT (Sec) |
|----------------------|------------------------------|---------------------------------|----------|---------|---------|--------|--------|--------|----------|
| <i>h<sub>a</sub></i> | et                           | Extra Trees Regressor           | 1.6919   | 5.6881  | 2.3849  | 0.8456 | 0.2304 | 0.2094 | 36.987   |
|                      | rf                           | Random Forest Regressor         | 1.8013   | 6.2508  | 2.5001  | 0.8303 | 0.2426 | 0.2256 | 149.23   |
|                      | xgboost                      | Extreme Gradient Boosting       | 2.4366   | 10.4521 | 3.2329  | 0.7162 | 0.3096 | 0.3106 | 2.3      |
|                      | catboost                     | CatBoost Regressor              | 2.5239   | 11.2227 | 3.35    | 0.6953 | 0.318  | 0.3214 | 5.143    |
|                      | lightgbm                     | Light Gradient Boosting Machine | 2.6471   | 12.1383 | 3.484   | 0.6705 | 0.3304 | 0.3395 | 2.491    |
|                      | dt                           | Decision Tree Regressor         | 2.3943   | 12.1877 | 3.491   | 0.6691 | 0.331  | 0.2861 | 14.082   |
|                      | knn                          | K Neighbors Regressor           | 2.6074   | 12.6528 | 3.557   | 0.6565 | 0.3361 | 0.3308 | 8.528    |
|                      | gbr                          | Gradient Boosting Regressor     | 2.9095   | 14.6332 | 3.8253  | 0.6027 | 0.3552 | 0.3736 | 434.882  |
|                      | ridge                        | Ridge Regression                | 3.2646   | 18.7622 | 4.3315  | 0.4907 | 0.3881 | 0.4112 | 0.851    |
|                      | lr                           | Linear Regression               | 3.2648   | 18.7634 | 4.3316  | 0.4906 | 0.388  | 0.4112 | 1.018    |
|                      | en                           | Elastic Net                     | 3.5316   | 21.9934 | 4.6897  | 0.403  | 0.4076 | 0.444  | 6.587    |
|                      | lasso                        | Lasso Regression                | 3.5516   | 22.2246 | 4.7142  | 0.3967 | 0.4101 | 0.4479 | 3.508    |
|                      | llar                         | Lasso Least Angle Regression    | 3.5515   | 22.2239 | 4.7142  | 0.3967 | 0.4101 | 0.4478 | 0.483    |
|                      | ada                          | AdaBoost Regressor              | 3.7989   | 22.4426 | 4.7318  | 0.3906 | 0.4513 | 0.5552 | 58.039   |
|                      | huber                        | Huber Regressor                 | 3.5113   | 23.2    | 4.8164  | 0.3702 | 0.4037 | 0.4099 | 19.96    |
|                      | omp                          | Orthogonal Matching Pursuit     | 3.7264   | 24.1636 | 4.9156  | 0.344  | 0.4306 | 0.4726 | 0.478    |
| dummy                | Dummy Regressor              | 4.8126                          | 36.8399  | 6.0695  | -0.0001 | 0.5225 | 0.6262 | 0.579  |          |
| par                  | Passive Aggressive Regressor | 7.7406                          | 101.2993 | 8.9423  | -1.7571 | 0.6511 | 1.0584 | 2.015  |          |
| <i>h<sub>w</sub></i> | et                           | Extra Trees Regressor           | 1.9065   | 7.3298  | 2.7073  | 0.8136 | 0.2392 | 0.2079 | 37.832   |
|                      | rf                           | Random Forest Regressor         | 2.0165   | 7.9122  | 2.8128  | 0.7988 | 0.249  | 0.2221 | 235.223  |
|                      | xgboost                      | Extreme Gradient Boosting       | 2.7142   | 12.7939 | 3.5768  | 0.6747 | 0.3115 | 0.3031 | 1.389    |
|                      | catboost                     | CatBoost Regressor              | 2.8081   | 13.6734 | 3.6977  | 0.6523 | 0.3194 | 0.3135 | 3.786    |
|                      | lightgbm                     | Light Gradient Boosting Machine | 2.9343   | 14.6817 | 3.8316  | 0.6267 | 0.3303 | 0.3294 | 1.303    |
|                      | knn                          | K Neighbors Regressor           | 2.9068   | 15.4093 | 3.9254  | 0.6082 | 0.3364 | 0.3222 | 9.02     |
|                      | dt                           | Decision Tree Regressor         | 2.6828   | 15.4519 | 3.9308  | 0.6071 | 0.3402 | 0.2784 | 14.538   |
|                      | gbr                          | Gradient Boosting Regressor     | 3.2151   | 17.4789 | 4.1807  | 0.5555 | 0.3528 | 0.3609 | 305.293  |
|                      | lr                           | Linear Regression               | 3.5761   | 21.9306 | 4.683   | 0.4424 | 0.3806 | 0.3924 | 1.011    |
|                      | ridge                        | Ridge Regression                | 3.5758   | 21.9286 | 4.6827  | 0.4424 | 0.3807 | 0.3924 | 0.844    |
|                      | en                           | Elastic Net                     | 3.8366   | 25.5036 | 5.05    | 0.3516 | 0.3972 | 0.4198 | 8.725    |
|                      | ada                          | AdaBoost Regressor              | 3.9779   | 25.6071 | 5.0553  | 0.3483 | 0.4245 | 0.4867 | 55.947   |
|                      | lasso                        | Lasso Regression                | 3.85     | 25.7064 | 5.07    | 0.3464 | 0.3991 | 0.4223 | 2.785    |
|                      | llar                         | Lasso Least Angle Regression    | 3.85     | 25.7057 | 5.07    | 0.3464 | 0.3991 | 0.4223 | 0.748    |
|                      | huber                        | Huber Regressor                 | 3.826    | 26.2451 | 5.1229  | 0.3327 | 0.396  | 0.4062 | 27.058   |
|                      | omp                          | Orthogonal Matching Pursuit     | 3.9208   | 26.6611 | 5.163   | 0.3222 | 0.4078 | 0.4322 | 0.768    |
| dummy                | Dummy Regressor              | 4.8249                          | 39.3345  | 6.2715  | -0.0001 | 0.4776 | 0.5369 | 0.38   |          |
| par                  | Passive Aggressive Regressor | 8.2102                          | 103.7467 | 9.5691  | -1.6382 | 0.6415 | 0.903  | 2.384  |          |

32 Notes: RMSLE is root mean squared logarithmic error, MAPE is mean absolute percentage error, TT

33 (Sec) is model training time, measured in seconds. Extra Trees Regressor (et) exhibits overfitting;

34 therefore, it was not selected in this study.

35

36 **Table S6.** The hyperparameter range for four ML algorithms.

| Algorithm | Python Package   | Hyperparameter Range                                                                                                                                                                                                                                                                                                                                                                      |
|-----------|------------------|-------------------------------------------------------------------------------------------------------------------------------------------------------------------------------------------------------------------------------------------------------------------------------------------------------------------------------------------------------------------------------------------|
| RF        | sklearn.ensemble | max_depth:[3,30]<br>n_estimators:[ 5000, 8000]<br>max_features:['sqrt', 'log2']<br>min_samples_split:[ 2, 10]<br>min_samples_leaf:[ 2, 10]<br>random_state: 2024                                                                                                                                                                                                                          |
| XGBoost   | xgboost          | max_depth:[3,10]<br>learning_rate: [0.005, 0.01]<br>n_estimators:[2000, 8000]<br>min_child_weight:[1, 300]<br>gamma:(0.0001,1,log=True)<br>reg_alpha: (0.0001,10,log=True)<br>reg_lambda: (0.0001,10,log=True)<br>colsample_bytree:[0.1, 0.8]<br>subsample:[0.6, 0.8]<br>random_state: 2024                                                                                               |
| LightGBM  | lightgbm         | reg_alpha: [0.001, 10.0]<br>reg_lambda: [0.001, 10.0]<br>num_leaves: [11, 333]<br>min_child_samples: [5, 100]<br>max_depth: [3, 20]<br>learning_rate: [0.001,0.005,0.01,0.05,0.1]<br>colsample_bytree: [0.1, 0.5]<br>n_estimators: [7000, 8000]<br>cat_smooth: [10, 100]<br>cat_l2: [1, 20]<br>min_data_per_group: [50, 200]<br>cat_feature: [10, 60]<br>n_jobs: -1<br>random_state: 2024 |
| CatBoost  | catboost         | depth: [3, 10]<br>learning_rate: [0.001,0.005,0.01,0.05,0.1]<br>iterations: [5000, 9000]<br>max_bin: [200, 400]<br>min_data_in_leaf: [1, 30]<br>l2_leaf_reg: [0.0001, 1.0, log=True]<br>subsample: [0.6, 0.9]<br>random_state: 2024                                                                                                                                                       |

37 **Table S7.** The optimal hyperparameter parameter values for different MLAs.

| Algorithm | Hyperparameter values ( $h_a$ )                                                                                            | Hyperparameter values ( $h_w$ )                                                                                            |
|-----------|----------------------------------------------------------------------------------------------------------------------------|----------------------------------------------------------------------------------------------------------------------------|
| RF        | {'max_depth': 22,<br>'n_estimators': 100,<br>'max_features': 'sqrt',<br>'min_samples_split': 10,<br>'min_samples_leaf': 1} | {'max_depth': 16,<br>'n_estimators': 100,<br>'max_features': 'sqrt',<br>'min_samples_split': 10,<br>'min_samples_leaf': 1} |

| Algorithm       | Hyperparameter values ( $h_a$ )                                                                                                                                                                                                                                                                                                                           | Hyperparameter values ( $h_w$ )                                                                                                                                                                                                                                                                                                                           |
|-----------------|-----------------------------------------------------------------------------------------------------------------------------------------------------------------------------------------------------------------------------------------------------------------------------------------------------------------------------------------------------------|-----------------------------------------------------------------------------------------------------------------------------------------------------------------------------------------------------------------------------------------------------------------------------------------------------------------------------------------------------------|
| <b>XGBoost</b>  | 'random_state': 2024}<br>{'max_depth': 10,<br>'learning_rate': 0.01,<br>'n_estimators': 6265,<br>'min_child_weight': 15,<br>'gamma': 0.002099983206704338,<br>'alpha': 0.1497537570416905,<br>'lambda': 0.002539897498632027,<br>'colsample_bytree': .676096315705994,<br>'subsample': 0.6382245679230509,<br>'random_state': 2024}                       | 'random_state': 2024}<br>{'max_depth': 10,<br>'learning_rate': 0.01,<br>'n_estimators': 6718,<br>'min_child_weight': 4,<br>'gamma': 0.013363217961312412,<br>'alpha': 1.9018751797973954,<br>'lambda': 0.009243058986896945,<br>'colsample_bytree': .5708992971238507,<br>'subsample': 0.769691304776139,<br>'random_state': 2024}                        |
| <b>LGBM</b>     | {'reg_alpha': 2.2098573262841947,<br>'reg_lambda': 4.777845816164959,<br>'num_leaves': 312,<br>'min_child_samples': 5,<br>'max_depth': 17,<br>'learning_rate': 0.1,<br>'colsample_bytree': .4790174793827581,<br>'n_estimators': 7042,<br>'cat_smooth': 61,<br>'cat_l2': 17,<br>'min_data_per_group': 117,<br>'cat_feature': 13,<br>'random_state': 2024} | {'reg_alpha': 1.9287086325195282,<br>'reg_lambda': 5.462281985773448,<br>'num_leaves': 298,<br>'min_child_samples': 5,<br>'max_depth': 19,<br>'learning_rate': 0.05,<br>'colsample_bytree': .4671945299775325,<br>'n_estimators': 7759,<br>'cat_smooth': 14,<br>'cat_l2': 16,<br>'min_data_per_group': 122,<br>'cat_feature': 20<br>'random_state': 2024} |
| <b>CatBoost</b> | {'depth': 10,<br>'learning_rate': 0.05,<br>'iterations': 7556,<br>'max_bin': 366,<br>'min_data_in_leaf': 14,<br>'l2_leaf_reg': 0.004530685052947802,<br>'subsample': 0.6243190198912542,<br>'random_state': 2024}                                                                                                                                         | {'depth': 10,<br>'learning_rate': 0.05,<br>'iterations': 7936,<br>'max_bin': 366,<br>'min_data_in_leaf': 12,<br>'l2_leaf_reg': 0.048609449544924604,<br>'subsample': 0.6316663275897422<br>'random_state': 2024}                                                                                                                                          |

39 **Table S8.** The training results of different MLAs

| Model | Algorithm | Train  |        |        |        |          | Test   |         |        |        |
|-------|-----------|--------|--------|--------|--------|----------|--------|---------|--------|--------|
|       |           | R2     | MSE    | RMSE   | MAE    | Times(s) | R2     | MSE     | RMSE   | MAE    |
| $h_a$ | RF        | 0.9107 | 3.2902 | 1.8139 | 1.3638 | 126.52   | 0.8138 | 6.8901  | 2.6249 | 1.9405 |
|       | XGBoost   | 0.8670 | 4.8885 | 2.2110 | 1.6840 | 78.23    | 0.8000 | 7.4147  | 2.7230 | 2.0220 |
|       | LGBM      | 0.9860 | 0.5170 | 0.7190 | 0.5320 | 42.37    | 0.8210 | 6.6255  | 2.5740 | 1.8580 |
|       | CatBoost  | 0.8800 | 4.4310 | 2.1050 | 1.6110 | 427.16   | 0.8010 | 7.3495  | 2.7110 | 2.0120 |
| $h_w$ | RF        | 0.7696 | 9.0625 | 3.0104 | 2.3070 | 98.40    | 0.7169 | 11.1984 | 3.3464 | 2.5307 |
|       | XGBoost   | 0.8770 | 4.8180 | 2.1950 | 1.6780 | 98.03    | 0.7750 | 8.9162  | 2.9860 | 2.2060 |
|       | LGBM      | 0.9560 | 1.7424 | 1.3200 | 0.9790 | 96.71    | 0.7890 | 8.3405  | 2.8880 | 2.0940 |
|       | CatBoost  | 0.8590 | 5.5413 | 2.3540 | 1.7970 | 672.64   | 0.7670 | 9.2112  | 3.0350 | 2.2510 |

40 Notes:  $h_a$  is arithmetic mean height;  $h_w$  is weighted mean height

41 **Table S9.** The fitting results of ML-based mixed-effects models

| Model | Equation                                    | Npar | AIC     | BIC     | logLik  | Chisq  | Df | Pr(>Chisq) | Signif. codes |
|-------|---------------------------------------------|------|---------|---------|---------|--------|----|------------|---------------|
| $h_a$ | $h_a \sim fixed\_h_a + (1   zone)$          | 4    | 962124  | 962165  | -481058 |        |    |            |               |
|       | $h_a \sim fixed\_h_a + (fixed\_h_a   zone)$ | 6    | 962107  | 962168  | -481048 | 20.594 | 2  | 3.370E-05  | ***           |
| $h_w$ | $h_w \sim fixed\_h_w + (1   zone)$          | 4    | 1008669 | 1008710 | -504331 |        |    |            |               |
|       | $h_w \sim fixed\_h_w + (fixed\_h_a   zone)$ | 6    | 1008650 | 1008711 | -504319 | 23.173 | 2  | 9.293E-06  | ***           |

42 Notes:  $h_a$  is arithmetic mean height, corresponding to the response variable in the mixed model structure;  $h_w$  is weighted mean height, corresponding to the response  
43 variable in the mixed model structure;  $fixed\_h_a$  represents the predicted values of arithmetic mean height in machine learning, corresponding to the covariate in the mixed  
44 model structure;  $fixed\_h_w$  represents the predicted values of weighted mean height in machine learning, corresponding to the covariate in the mixed model structure; (1 |  
45 zone) indicates fitting random intercepts at the level of the grouping variable "zone"; (x | zone) indicates fitting a random slope related to the covariate at each level of the  
46 grouping variable "zone"; Signif. codes: 0 '\*\*\*' 0.001 '\*\*' 0.01 '\*' 0.05 '.' 0.1 ' ' 1

**Note S1**

The relative uncertainty for each pixel is calculated using Eq (1)

$$\varepsilon_i = \frac{RMSE}{\hat{y}_i} \quad (1)$$

where  $RMSE$  is the root mean squared error of validation set,  $\hat{y}_i$  represents the predicted value of  $i^{th}$  observed value.

50 The mean of relative uncertainty for all pixels is calculated using Eq (2)

$$\bar{\varepsilon} = \frac{\sum_{i=1}^N \frac{RMSE}{\hat{y}_i}}{N} \times 100\% = RMSE \frac{\sum_{i=1}^N \frac{1}{\hat{y}_i}}{N} \times 100\% \quad (2)$$

We know that the harmonic mean is less than or equal to the arithmetic mean, which is expressed as Eq (3), then mathematically

Eq (2) is expressed as Eq (4):

$$\frac{N}{\sum_{i=1}^N \frac{1}{\hat{y}_i}} \leq \frac{\sum_{i=1}^N \hat{y}_i}{N} = \bar{y} \quad (3)$$

$$\bar{\varepsilon} = \frac{\sum_{i=1}^N \frac{RMSE}{\hat{y}_i}}{N} \times 100\% = RMSE \frac{\sum_{i=1}^N \frac{1}{\hat{y}_i}}{N} \times 100\% \leq \frac{RMSE}{\bar{y}} \times 100\% \quad (4)$$

So, the maximum of mean  $\varepsilon_{product}$  is calculated by Eq (5)

$$\bar{\varepsilon}_{max} = \frac{RMSE}{\bar{y}} \times 100\% \quad (5)$$
